# Supplementary material for: Construction of a flexible covalent organic framework based on triazine units with interesting photoluminescent properties for sensitive and selective detection of picric acid
Source: Royal Society of Chemistry journal article supplement (doi:10.1039/c9ra06583k), 2019-01-01
Supplement: c9ra06583k1.pdf [file c9ra06583k1.pdf]

Supporting information

**Construction of a flexible covalent organic framework based on triazine units with interesting photoluminescent properties for sensitive and selective detection of picric acid**

Yanjie Li,<sup>a</sup> Yanan Han,<sup>a</sup> Minghui Chen,<sup>a</sup> Yaqing Feng<sup>ab</sup> and Bao Zhang<sup>\*a</sup>

<sup>a</sup>*School of Chemical Engineering and Technology, Tianjin University, Tianjin, 300072, P. R. China.*

<sup>b</sup>*Collaborative Innovation Center of Chemical Science and Engineering, Tianjin, 300072, P. R. China.*

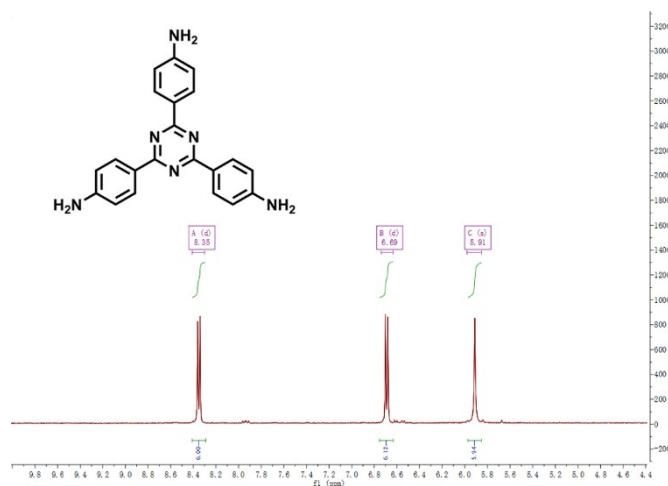

Fig. S1  $^1\text{H}$  NMR spectra (400 MHz) of TPT-NH<sub>2</sub>.

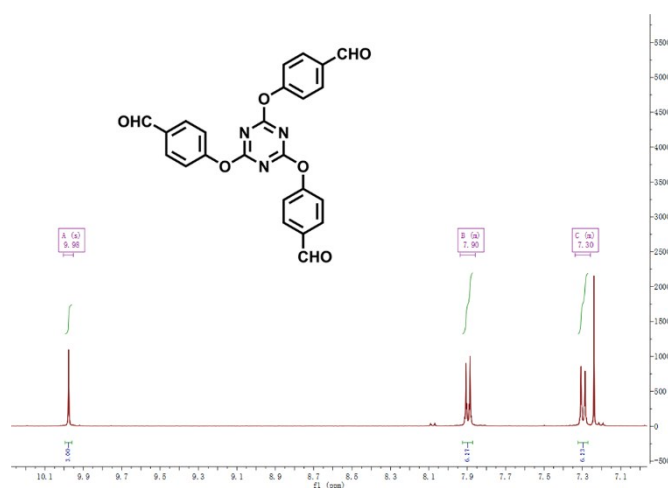

Fig. S2  $^1\text{H}$  NMR spectra (400 MHz) of TPOT-CHO.

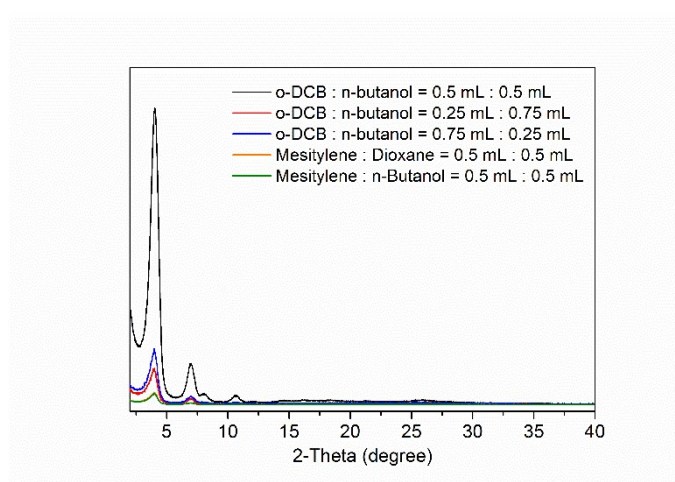

Fig. S3 PXRD patterns of DTZ-COF prepared under different solvothermal conditions.

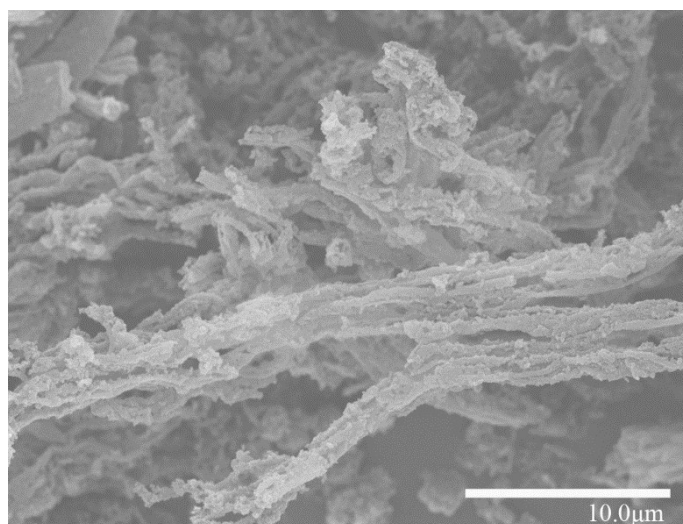

Fig. S4 SEM image of DTZ-COF synthesized under solvothermal condition.

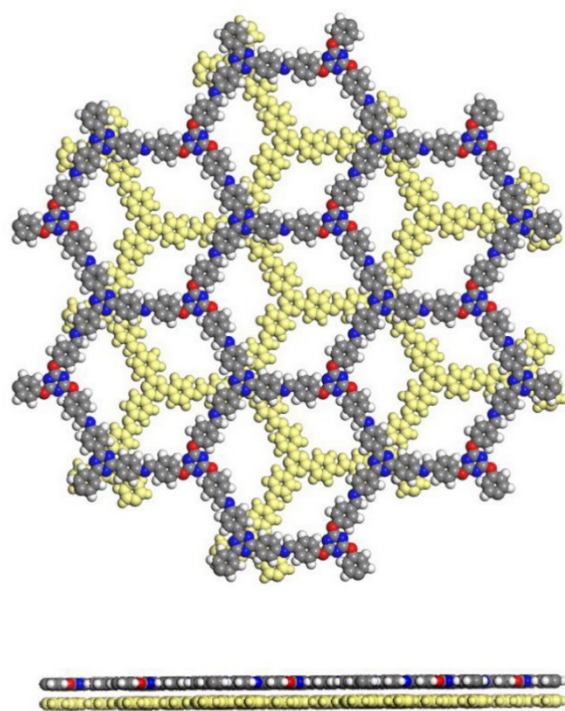

Fig. S5 The top view and side view of AB stacking mode of DTZ-COF.

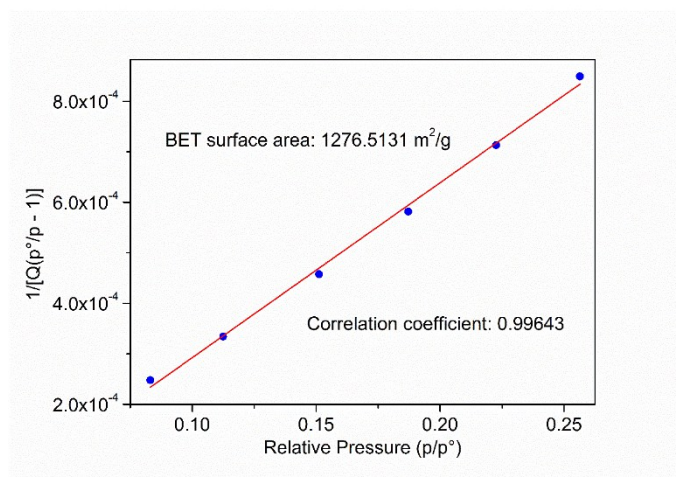

Fig. S6 Multiple point BET plot of DTZ-COF synthesized by solvothermal method giving a specific surface area of 1276 m<sup>2</sup>/g.

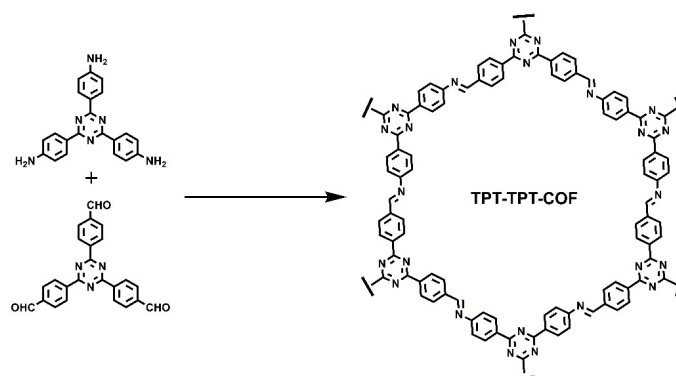

Fig. S7 Schematic diagram of synthesis of TPT-TPT-COF.

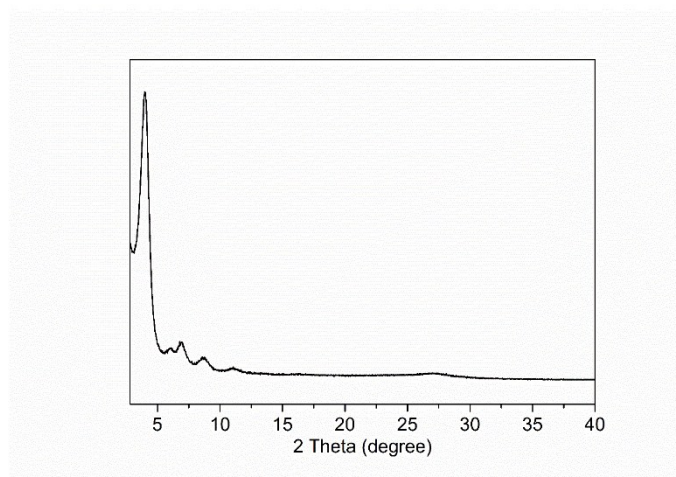

Fig. S8 PXRD pattern of TPT-TPT-COF.

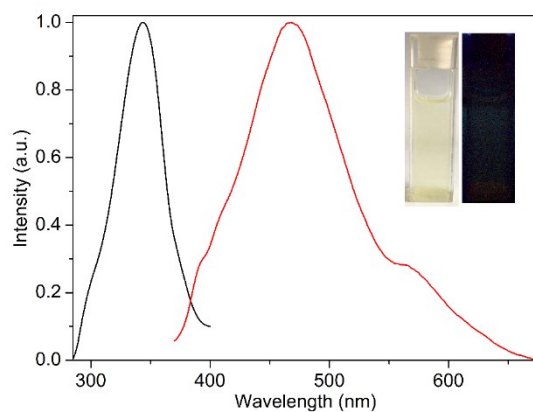

Fig. S9 Normalized fluorescence excitation (black) and emission (red) spectra of TPT-TPT-COF in THF dispersion. Inset: Images of TPT-TPT-COF in THF dispersion under sun-light and UV-light irradiation of 365 nm.

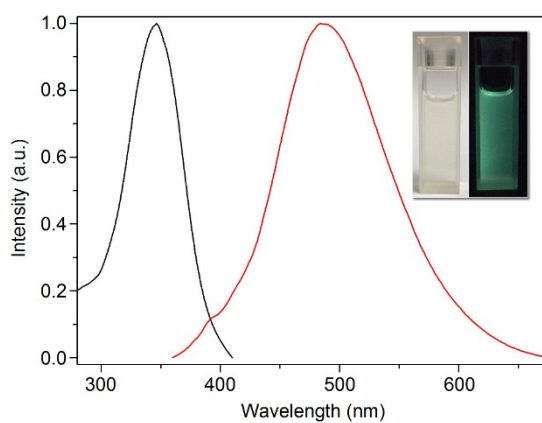

Fig. S10 Normalized fluorescence excitation (black) and emission (red) spectra of DTZ-COF in THF dispersion. Inset: Images of DTZ-COF in THF dispersion under sun-light and UV-light irradiation of 365 nm.

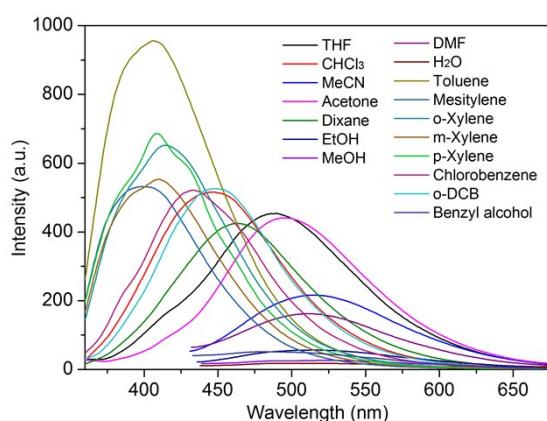

Fig. S11 The fluorescence emission spectra of DTZ-COF dispersed in different solvents ( $\lambda_{\text{ex}} = 350$  nm).

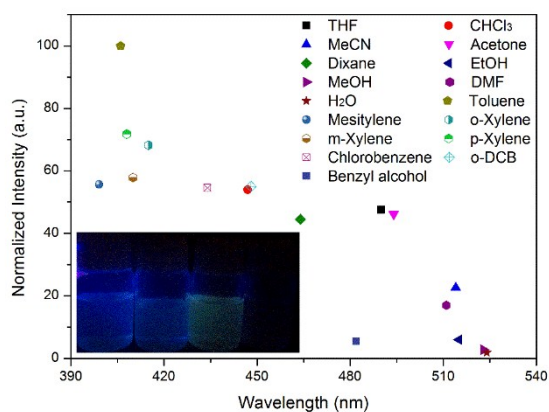

Fig. S12 The wavelength and intensity of the fluorescence emission of DTZ-COF in different solvents ( $\lambda_{\text{ex}} = 350$  nm). Inset: Images of DTZ-COF in toluene,  $\text{CHCl}_3$ , THF and  $\text{H}_2\text{O}$  (from left to right) dispersions under UV-light irradiation of 365 nm.

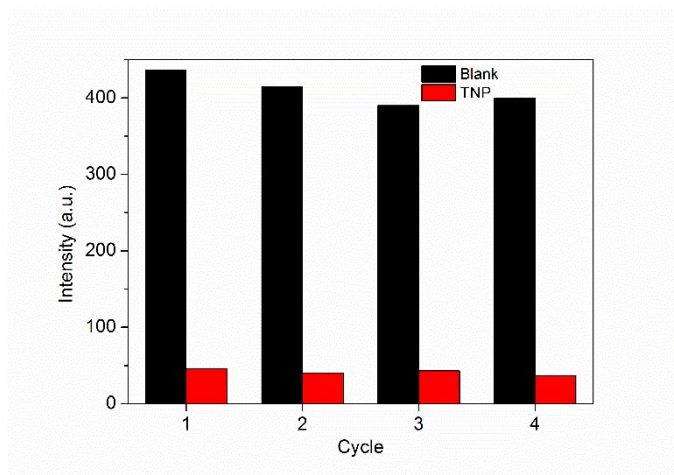

Fig. S13 Cycling test of DTZ-COF for the detection of TNP.



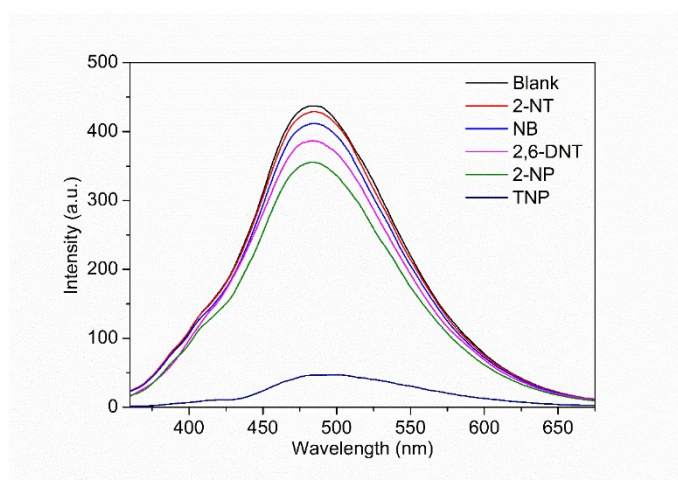

Fig. S14 The fluorescence emission spectra of DTZ-COF in THF dispersions upon addition of different nitroaromatic compounds at a concentration of 10.7 ppm ( $\lambda_{\text{ex}} = 350 \text{ nm}$ ).

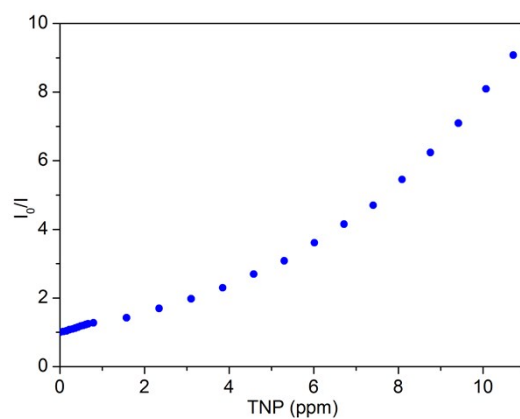

Fig. S15 Stern-Volmer plot for fluorescence quenching of DTZ-COF by TNP.

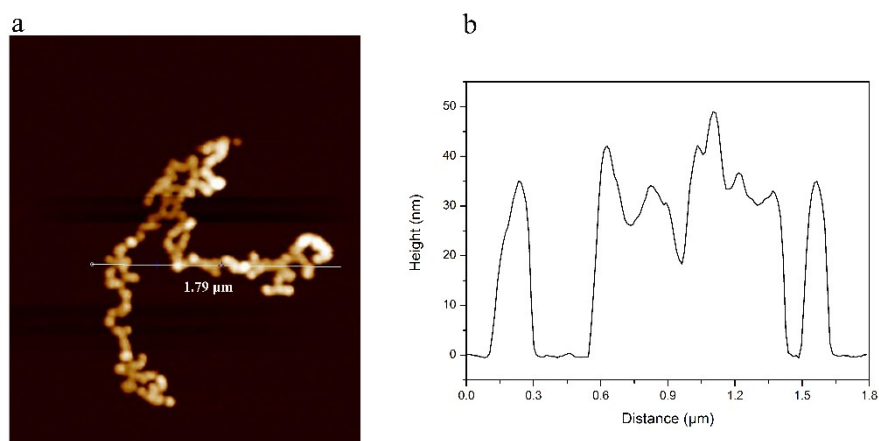

Fig. S16 AFM image (a) and height distribution (b) of DTZ-COF.

Table S1 Fractional atomic coordinates for the unit cell of DTZ-COF.

| DTZ-COF                                         |         |         |         |      |         |         |         |
|-------------------------------------------------|---------|---------|---------|------|---------|---------|---------|
| Space group symmetry P3                         |         |         |         |      |         |         |         |
| a = b = 26.8882 Å, c = 3.6611 Å                 |         |         |         |      |         |         |         |
| $\alpha = \beta = 90^\circ, \gamma = 120^\circ$ |         |         |         |      |         |         |         |
| Atom                                            | x(Å)    | y(Å)    | z(Å)    | Atom | x(Å)    | y(Å)    | z(Å)    |
| N1                                              | 0.32162 | 0.58172 | 0.13578 | N43  | 0.74677 | 0.31472 | 0.13578 |
| C2                                              | 0.33056 | 0.53652 | 0.13578 | C44  | 0.8288  | 0.29818 | 0.13578 |
| N3                                              | 0.38479 | 0.54598 | 0.13578 | C45  | 0.84933 | 0.25932 | 0.13578 |
| C4                                              | 0.42998 | 0.60014 | 0.13578 | C46  | 0.57039 | 0.11722 | 0.13578 |
| N5                                              | 0.42055 | 0.64493 | 0.13578 | C47  | 0.62978 | 0.13772 | 0.13578 |
| C6                                              | 0.36639 | 0.63594 | 0.13578 | C48  | 0.90844 | 0.27935 | 0.13578 |
| O7                                              | 0.35445 | 0.68117 | 0.13578 | C49  | 0.9478  | 0.33842 | 0.13578 |
| C8                                              | 0.39831 | 0.7394  | 0.13578 | C50  | 0.92738 | 0.37747 | 0.13578 |
| O9                                              | 0.48715 | 0.61207 | 0.13578 | C51  | 0.86829 | 0.35741 | 0.13578 |
| C10                                             | 0.50151 | 0.5682  | 0.13578 | C52  | 0.6495  | 0.09822 | 0.13578 |
| C11                                             | 0.22711 | 0.46506 | 0.13578 | C53  | 0.61044 | 0.03913 | 0.13578 |
| O12                                             | 0.28532 | 0.47936 | 0.13578 | C54  | 0.55097 | 0.01873 | 0.13578 |
| C13                                             | 0.38115 | 0.78083 | 0.13578 | C55  | 0.53128 | 0.05811 | 0.13578 |
| C14                                             | 0.42182 | 0.83951 | 0.13578 | N56  | 0.50982 | 0.95848 | 0.13578 |
| C15                                             | 0.48068 | 0.85776 | 0.13578 | N57  | 0.00807 | 0.35756 | 0.13578 |
| C16                                             | 0.4984  | 0.81691 | 0.13578 | H58  | 0.33427 | 0.76933 | 0.13578 |
| C17                                             | 0.45761 | 0.75828 | 0.13578 | H59  | 0.40635 | 0.87234 | 0.13578 |
| C18                                             | 0.18566 | 0.40648 | 0.13578 | H60  | 0.54539 | 0.82892 | 0.13578 |
| C19                                             | 0.12699 | 0.38849 | 0.13578 | H61  | 0.47531 | 0.72715 | 0.13578 |
| C20                                             | 0.10877 | 0.42912 | 0.13578 | H62  | 0.20045 | 0.37314 | 0.13578 |
| C21                                             | 0.14964 | 0.48769 | 0.13578 | H63  | 0.0966  | 0.34234 | 0.13578 |
| C22                                             | 0.20828 | 0.50551 | 0.13578 | H64  | 0.13439 | 0.52069 | 0.13578 |
| C23                                             | 0.5601  | 0.58535 | 0.13578 | H65  | 0.24011 | 0.55124 | 0.13578 |
| C24                                             | 0.5781  | 0.54468 | 0.13578 | H66  | 0.59107 | 0.63135 | 0.13578 |
| C25                                             | 0.53748 | 0.48582 | 0.13578 | H67  | 0.62514 | 0.55691 | 0.13578 |
| C26                                             | 0.47891 | 0.46812 | 0.13578 | H68  | 0.44833 | 0.42201 | 0.13578 |
| C27                                             | 0.46108 | 0.50892 | 0.13578 | H69  | 0.41378 | 0.49546 | 0.13578 |
| C28                                             | 0.52424 | 0.91903 | 0.13578 | H70  | 0.57125 | 0.93113 | 0.13578 |
| C29                                             | 0.55518 | 0.44226 | 0.13578 | H71  | 0.52218 | 0.39693 | 0.13578 |
| N30                                             | 0.60903 | 0.45666 | 0.13578 | H72  | 0.03128 | 0.4437  | 0.13578 |
| C31                                             | 0.0475  | 0.41142 | 0.13578 | H73  | 0.54158 | 0.34142 | 0.13578 |
| C32                                             | 0.62815 | 0.41552 | 0.13578 | H74  | 0.57819 | 0.27099 | 0.13578 |
| C33                                             | 0.58909 | 0.35606 | 0.13578 | H75  | 0.75476 | 0.41087 | 0.13578 |
| C34                                             | 0.60912 | 0.317   | 0.13578 | H76  | 0.71648 | 0.48165 | 0.13578 |



|     |         |         |         |     |         |         |         |
|-----|---------|---------|---------|-----|---------|---------|---------|
| C35 | 0.66835 | 0.33673 | 0.13578 | H77 | 0.81869 | 0.21323 | 0.13578 |
| C36 | 0.70723 | 0.39612 | 0.13578 | H78 | 0.55135 | 0.14726 | 0.13578 |
| C37 | 0.68722 | 0.43522 | 0.13578 | H79 | 0.92716 | 0.24905 | 0.13578 |
| C38 | 0.68948 | 0.29553 | 0.13578 | H80 | 0.95812 | 0.42353 | 0.13578 |
| N39 | 0.65179 | 0.23815 | 0.13578 | H81 | 0.85157 | 0.3893  | 0.13578 |
| C40 | 0.67098 | 0.20006 | 0.13578 | H82 | 0.69683 | 0.11182 | 0.13578 |
| N41 | 0.72837 | 0.21975 | 0.13578 | H83 | 0.62743 | 0.00745 | 0.13578 |
| C42 | 0.76646 | 0.27703 | 0.13578 | H84 | 0.4838  | 0.04369 | 0.13578 |

#### Notes and References:

- 1 P. Das and S. K. Mandal, *J. Mater. Chem. A*, 2018, **6**, 16246–16256.
- 2 X. Z. Song, S. Y. Song, S. N. Zhao, Z. M. Hao, M. Zhu, X. Meng, L. L. Wu and H. J. Zhang, *Adv. Funct. Mater.*, 2014, **24**, 4034–4041.
- 3 A. F. M. El-Mahdy, C. H. Kuo, A. Alshehri, C. Young, Y. Yamauchi, J. Kim and S. W. Kuo, *J. Mater. Chem. A*, 2018, **6**, 19532–19541.
